# Supplementary material
Source: Springer Nature journal article supplement (https://www.springermedizin.de/resource/supplementary/12907_2013_142_MOESM7_ESM.pdf/9524734)

H&E

Negative VRK1

Positive VRK1

Negative VRK2

Positive VRK2

Low-grade  
Astrocytomas

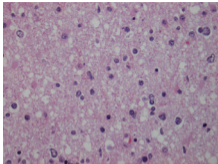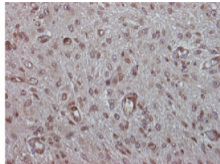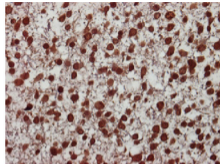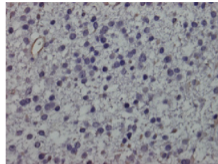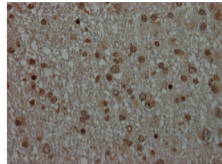

High-grade  
Astrocytomas

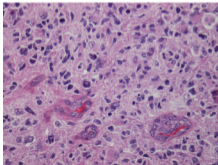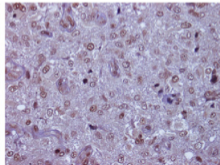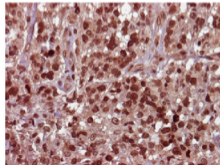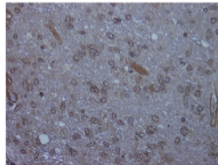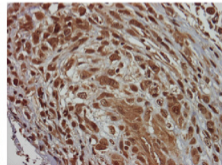

Supplement: MOESM7 [file 9524734]
